# Supplementary material for: Pathway selection by an active droplet
Source: Royal Society of Chemistry journal article supplement (doi:10.1039/d3sm00610g), 2023-01-01
Supplement: d3sm00610g14.pdf [file d3sm00610g14.pdf]

### §-I. RELATED VIDEOS

#### 1. Related to Figure 2

- Movie 1 : Symmetric channel: An experimental trace (blue) of a  $4\mu\text{l}$  1-pentanol drop in the symmetric channel.
- Movie 2 : Asymmetric channel: An experimental trace (blue) of a  $4\mu\text{l}$  1-pentanol drop in the asymmetric channel.

#### 2. Combined fast-forwarded experimental trials: (Movies have been fast-forwarded ( $\approx 5x$ to $15x$ ).

- Movie 3 : 10 Experimental trials of a  $4\mu\text{l}$  drop in the symmetric environment (channel) with the counter. The drop chooses the left arm with 60 % probability.
- Movie 4 : 10 Experimental trials of a  $4\mu\text{l}$  drop in the asymmetric environment (channel) with the counter. The drop chooses the wider arm with 80 % probability.

#### 3. Related to Figure 3

- Movie 5 : An experimental trace (blue) of a  $4\mu\text{l}$  1-pentanol drop in the chemically asymmetric environment (channel) where the confined drop is in the left arm.

- Movie 6 : An experimental trace (blue) of a  $4\mu\text{l}$  1-pentanol drop in the chemically asymmetric environment (channel) where the confined drop is in the source arm.
- Movie 7 : An experimental trace (blue) of a  $4\mu\text{l}$  1-pentanol drop in the chemically asymmetric environment (channel) where the confined drop is in the right arm.

#### 4. Combined fast-forwarded simulations.

- Movie 8 : Simulated 100 trajectories for a symmetric channel, in which 49 times the drop chose the left path and the rest 51 times the right one.
- Movie 9(a) : Simulated 50 trajectories for an asymmetric channel where the left arm is the narrower arm.
- Movie 9(b) : Simulated 50 trajectories for an asymmetric channel where the right arm is the narrower arm.
- Movie 10 : Simulated 50 runs for a free drop in a chemically asymmetric environment where the confined extra drop is in the left arm.
- Movie 11 : Simulated 50 runs for a free drop in a chemically asymmetric environment where the confined extra drop is in the source arm.
- Movie 12 : Simulated 50 runs for a free drop in a chemically asymmetric environment where the confined extra drop is in the right arm.
